# Supplementary material for: Template free synthesis of crystallized nanoporous F-Ta2O5 spheres for effective photocatalytic hydrogen production
Source: Royal Society of Chemistry journal article supplement (doi:10.1039/c2nr30721a), 2012-01-01
Supplement: c2nr30721a.pdf [file c2nr30721a.pdf]

*Photocatalytic hydrogen evolution reaction.*

The photocatalytic reactions were carried out in a gas-closed circulation system. The photocatalyst powder (0.05 g) was dispersed in 100 ml aqueous methanol solutions (volume ratio 1/9) by a magnetic stirrer in an outer irradiation quartz reaction cell. The amounts of H<sub>2</sub> evolved were determined by gas chromatography (TCD, molecular sieve 5Å column, Ar carrier).

**Figure S1** SEM image of (a) C- Ta<sub>2</sub>O<sub>5</sub> and (b) Ta<sub>2</sub>O<sub>5</sub> spheres.

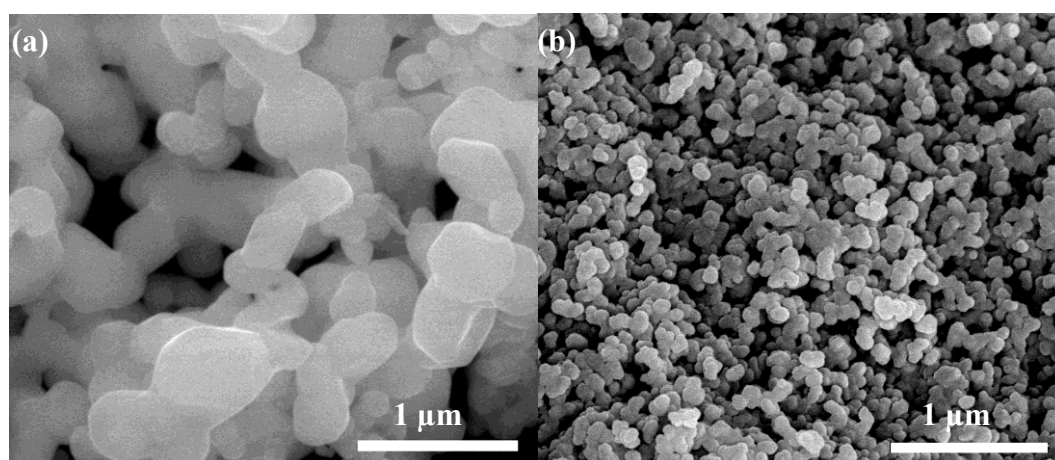

**Figure S2** XRD patterns of Ta<sub>2</sub>O<sub>5</sub> spheres obtained by co-precipitation.

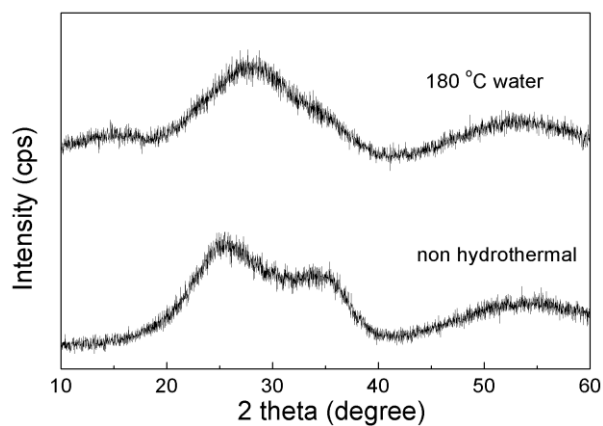

**Table S1** Element analysis of the Ta<sub>2</sub>O<sub>5</sub> spheres before and after the photocatalytic reaction.

|               | <b>Ta / at%</b> | <b>F / at%</b> | <b>O / at%</b> |
|---------------|-----------------|----------------|----------------|
| <b>before</b> | 24.01           | 25.09          | 50.90          |
| <b>after</b>  | 26.62           | 23.97          | 49.40          |
